# Supplementary material for: Insights into the molecular interactions between urease subunit gamma from MRSA and drugs: an integrative approach by STD-NMR and molecular docking studies
Source: Royal Society of Chemistry journal article supplement (doi:10.1039/d4ra01732c), 2024-01-01
Supplement: d4ra01732c1.pdf [file d4ra01732c1.pdf]

## Supplementary Data

**Table-S1: PCR reaction mixture for gene isolation.**

| Component           | Volume in $\mu\text{L}$ (Concentration) |
|---------------------|-----------------------------------------|
| Nuclease Free Water | 44.5                                    |
| PCR Buffer (10 x)   | 7.5 (1x)                                |
| dNTPs               | 15 (100 $\mu\text{M}$ )                 |
| Primer Forward      | 3 (0.4 $\mu\text{M}$ )                  |
| Primer Reverse      | 3 (0.4 $\mu\text{M}$ )                  |
| MRSA252 DNA         | 1 (65 ng)                               |
| Pfu Polymerase      | 1 (5 Units)                             |
| <b>Final Volume</b> | <b>75</b>                               |

**Table-S2: Thermal conditions for gene isolation PCR**

| Steps                | Temperature ( $^{\circ}\text{C}$ ) | Time (sec) | No. of Cycle/s |
|----------------------|------------------------------------|------------|----------------|
| Initial denaturation | 95                                 | 120        | 1              |
| Denaturation         | 94                                 | 30         | 35             |
| Annealing            | 53-55                              | 30         |                |
| Extension            | 72                                 | 30         |                |
| Final Extension      | 72                                 | 300        | 1              |
| End/Hold             | 4                                  | $\infty$   |                |

**Table-S3: Reaction mixtures for double digestion of pET25b (+) and urease subunit  $\gamma$  gene**

| Component                            | pET25b              | Ure G              |
|--------------------------------------|---------------------|--------------------|
| NFW                                  | 31.36 $\mu\text{L}$ | 19.5 $\mu\text{L}$ |
| NEB 2.1 (10X)                        | 5 $\mu\text{L}$     | 5 $\mu\text{L}$    |
| Vector/ Insert<br>(1 $\mu\text{g}$ ) | 12.64 $\mu\text{L}$ | 24.5 $\mu\text{L}$ |
| NdeI (20000<br>U/mL)                 | 0.5 $\mu\text{L}$   | 0.5 $\mu\text{L}$  |
| HindIII (20000<br>U/mL)              | 0.5 $\mu\text{L}$   | 0.5 $\mu\text{L}$  |
| Final volume                         | 50 $\mu\text{L}$    | 50 $\mu\text{L}$   |

**Table-S4: Reaction mixture for ligation of digested vector and urease subunit  $\gamma$  gene**

| Component            | Volume (Concentration) |
|----------------------|------------------------|
| Nuclease Free Water  | Up to 20 $\mu$ L       |
| Ligation Buffer (5X) | 4 $\mu$ L (1X)         |
| Restricted Vector    | 1 molar ratio          |
| Restricted Insert    | 5 molar ratio          |
| T4 DNA Ligase        | 1 $\mu$ L (1 Units)    |

**Table-S5: Reaction mixture for colony PCR**

| Component                        | Volume in $\mu$ L (Concentration) |
|----------------------------------|-----------------------------------|
| Nuclease free water              | 8                                 |
| PCR master mix (2X)              | 10 (1X)                           |
| T7 promoter primer (10 $\mu$ M)  | 1 (0.4 $\mu$ M)                   |
| Gene reverse primer (10 $\mu$ M) | 1 (0.4 $\mu$ M)                   |
| Transformed cultures             | 0.1                               |

**Table-S6: Thermal cycle conditions for colony PCR**

| Steps                | Temperature ( $^{\circ}$ C) | Time (sec) | No. of Cycle/s |
|----------------------|-----------------------------|------------|----------------|
| Initial denaturation | 95                          | 120        | 1              |
| Denaturation         | 94                          | 30         | 35             |
| Annealing            | 45                          | 30         |                |
| Extension            | 72                          | 30         |                |
| Final Extension      | 72                          | 300        | 1              |
| End/Hold             | 4                           | $\infty$   |                |

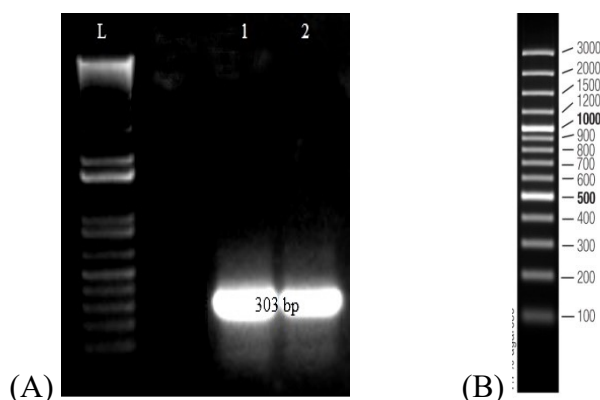**Figure-S1:** (A) Agarose gels of gene isolation PCR for gene corresponding to urease subunit  $\gamma$ . L represent the DNA ladder and numbers represents the wells containing PCR product. (B) DNA ladder profile.

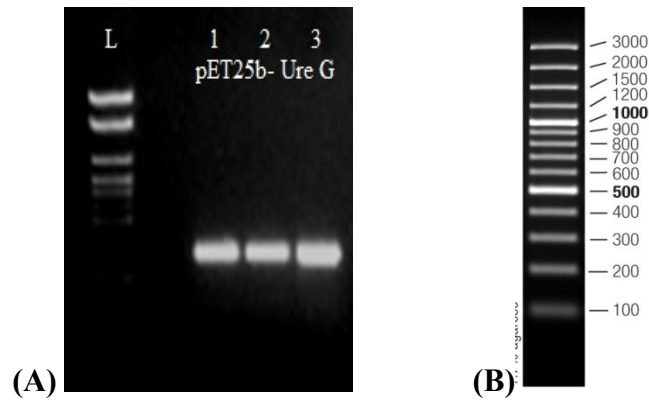

**Figure-S2:** (A) Colony PCR screening of recombinant clones for the successfully cloned gene urease subunit  $\gamma$ . L represents molecular size DNA ladder and numbers represent the screened colonies. (B) represents the molecular DNA ladder profile.

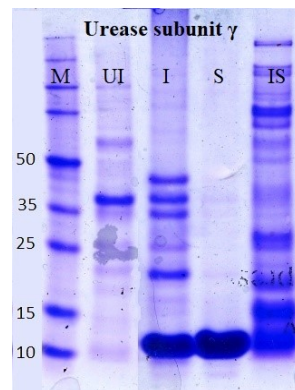

**Figure-S3:** Analysis of gene expression on SDS PAGE. M represents protein molecular weight marker, Whereas UI= un-induced, I= induced, S= soluble and IS= insoluble fractions. Urease subunit  $\gamma$  were successfully expressed in *E. coli* BL21DE3 cells.

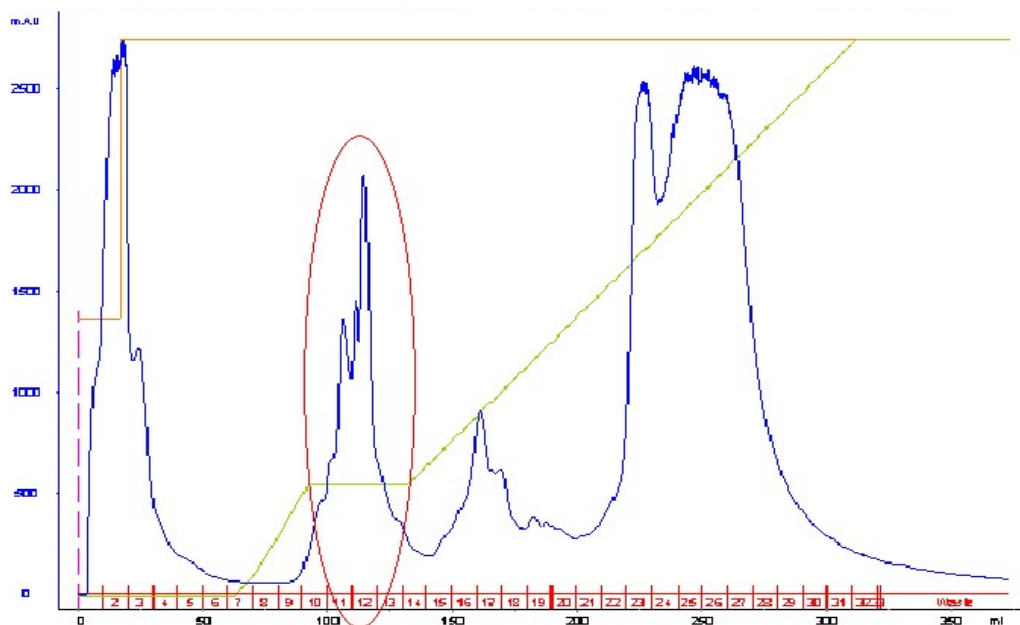

**Figure-S4:** An-ion exchange chromatogram of urease  $\gamma$ . Unbound fractions are 1 to 4, whereas elution starts from fraction 10 till 33. Urease  $\gamma$  was eluted in fraction 11 and 12 at 17% gradient of elution buffer.

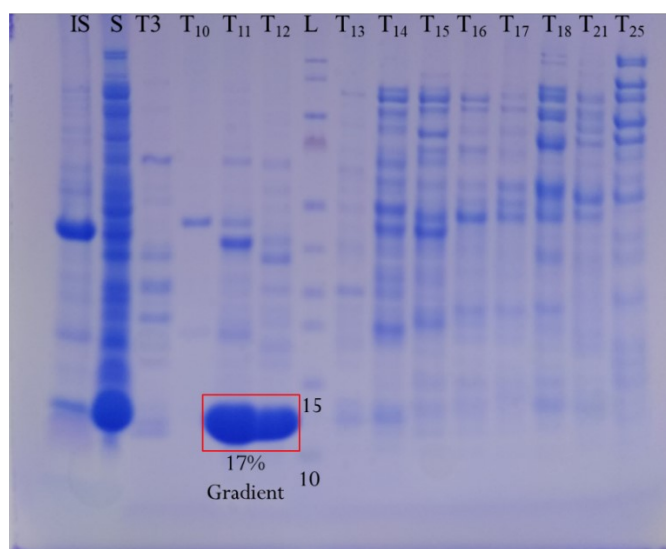

**Figure-S5:** SDS PAGE analysis of anion exchange. Fractions 11 and 12 contains partially purified Urease  $\gamma$ .

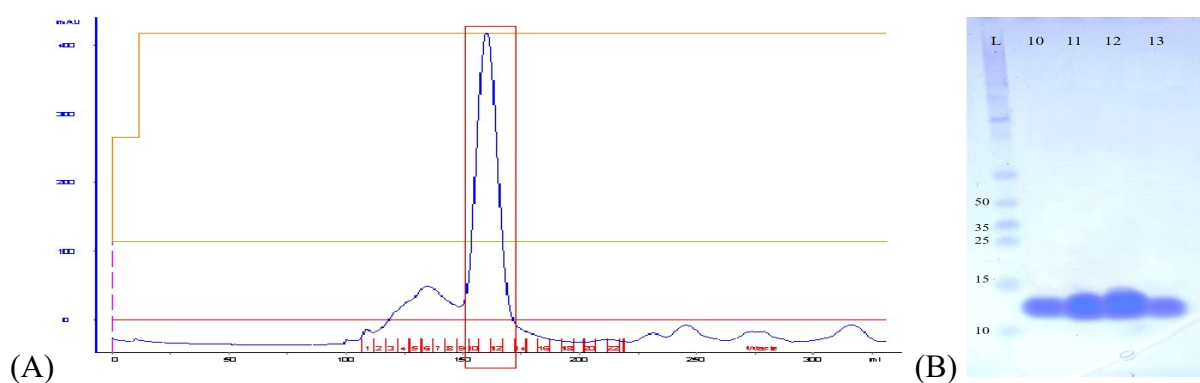

**Figure-S6:** Size exclusion chromatogram(A) and SDS PAGE analysis (B) of UreA. Fractions 10 to 13 contained eluted protein. Elution peak was obtained at 161 mL.

**Table-S7: Urease subunit gamma (MRSA252) sequence similarity with Jack bean urease**

| Description                                                                                               | Scientific Name | Max Score | Total Score | Query Cover | E value | Per. Ident | Acc. Len | Accession     |
|-----------------------------------------------------------------------------------------------------------|-----------------|-----------|-------------|-------------|---------|------------|----------|---------------|
| <input checked="" type="checkbox"/> sp P07374 UREA_CANEN Urease_OS=Canavalia ensiformis_OX=3823_PE=1.SV=3 |                 | 102       | 122         | 99%         | 6e-31   | 49.00%     | 840      | Query_6184523 |

**Table-S8: List of drugs for STD NMR**

| S. No. | Drug Code | Drug Name                 | Mixture No. |
|--------|-----------|---------------------------|-------------|
| 1.     | DB155     | Nicotinamide              | 01          |
| 2.     | DB156     | Suxamethonium HCl         |             |
| 3.     | DB157     | Thiamine HCl (Vitamin B1) |             |
| 4.     | DB158     | Topiramate                |             |
| 5.     | DB163     | Doxofylline               |             |
| 6.     | DB164     | Drotaverine hydrochloride | 02          |
| 7.     | DB172     | Citric Acid               |             |

|     |       |                                     |    |
|-----|-------|-------------------------------------|----|
| 8.  | DB173 | Clidinium bromide                   |    |
| 9.  | DB179 | Sitagliptin.PO4.H2O                 |    |
| 10. | DB184 | Amikacin sulphate                   |    |
| 11. | DB188 | Dorzolamide HCl                     |    |
| 12. | DB196 | Phenylephrine HCl                   |    |
| 13. | DB197 | Ribavirin                           | 03 |
| 14. | DB211 | Yohimbine                           |    |
| 15. | DB240 | Isoniazid                           |    |
| 16. | DB244 | Pyrazinamide                        |    |
| 17. | DB250 | Gentamicin Sulphate                 |    |
| 18. | DB252 | Histamin dihydrochloride            | 04 |
| 19. | DB258 | Serotonin HCl                       |    |
| 20. | DB273 | Solifenacin Succinate               |    |
| 21. | DB275 | Ceftriaxone Sodium                  |    |
| 22. | DB277 | Pefloxacin Mesylate                 |    |
| 23. | DB281 | Tobramycin                          | 05 |
| 24. | DB286 | Cefepime-L-Arginine                 |    |
| 25. | DB294 | Mannitol                            |    |
| 26. | DB302 | Guaifenesin                         |    |
| 27. | DB308 | Sulfanilamide                       |    |
| 28. | DB310 | Nicorandil                          | 06 |
| 29. | DB316 | Lisinopril                          |    |
| 30. | DB332 | Clindamycin Phosphate               |    |
| 31. | DB334 | Cetylpyridinium Chloride            |    |
| 32. | DB339 | Hydroxychloroquine Sulphate         |    |
| 33. | DB343 | Dexamethasone Sodium Phospahte      | 07 |
| 34. | DB346 | Doxycycline                         |    |
| 35. | DB347 | Hydralazine Hydrochloride           |    |
| 36. | DB358 | Ivabradine HCl                      |    |
| 37. | DB359 | Glucosamine HCl                     |    |
| 38. | DB362 | Ketamine                            | 08 |
| 39. | DB364 | Ephedrine                           |    |
| 40. | DB367 | Lactose Anhydrous                   |    |
| 41. | DB379 | Sodium Cyclamate                    |    |
| 42. | DB381 | Sodium Tartrate                     |    |
| 43. | DB382 | Bambuterol HCl                      | 09 |
| 44. | DB385 | Eperisone HCl                       |    |
| 45. | DB400 | Penicillin G Sodium                 |    |
| 46. | DB298 | Fusidic Acid                        |    |
| 47. | DB318 | Clomifene Citrate                   |    |
| 48. | DB373 | Promethazine Teoclate               | 10 |
| 49. | DB402 | Sulbactam Sodium                    |    |
| 50. | DB408 | Benzoyl Metronidazole               |    |
| 51. | DB008 | Captopril                           |    |
| 52. | DB020 | Lidocaine Hydrochloride monohydrate |    |
| 53. | DB029 | Paracetamol (Acetaminophen)         | 11 |
| 54. | DB035 | Sodium valproate                    |    |
| 55. | DB038 | Tramadol Hydrochloride              |    |

|      |       |                                              |    |
|------|-------|----------------------------------------------|----|
| 56.  | DB071 | Metformin HCl                                | 12 |
| 57.  | DB075 | Nicotinic Acid                               |    |
| 58.  | DB077 | D-Penicillamine                              |    |
| 59.  | DB082 | Tranexamic acid                              |    |
| 60.  | DB084 | Epinephrine Bitartrate/Adrenaline Bitartrate | 13 |
| 61.  | DB088 | Cefradine                                    |    |
| 62.  | DB104 | Lysine Hydrochloride                         |    |
| 63.  | DB107 | Salbutamol Sulfate                           |    |
| 64.  | DB110 | Bupropion Hydrochloride                      |    |
| 65.  | DB120 | Levetiracetam                                | 14 |
| 66.  | DB135 | Lincomycin Hydrochloride Monohydrate         |    |
| 67.  | DB137 | Metronidazole                                |    |
| 68.  | DB142 | Aminophylline                                |    |
| 69.  | DB146 | Pyridoxine HCl ( Vit. B6)                    |    |
| 70.  | DB170 | Aspartame                                    | 15 |
| 71.  | DB177 | Pregabalin                                   |    |
| 72.  | DB183 | Alendronate sodium                           |    |
| 73.  | DB190 | Hydroquinone                                 |    |
| 74.  | DB210 | Tenofovir disoproxil                         |    |
| 75.  | DB214 | Caffeine                                     | 16 |
| 76.  | DB232 | Ranitidine Hydrochloride                     |    |
| 77.  | DB236 | Ascorbic acid                                |    |
| 78.  | DB239 | Ethambutol 2HCl                              |    |
| 79.  | DB248 | Colchicine                                   |    |
| 80.  | DB295 | Deferiprone                                  | 17 |
| 81.  | DB313 | Lidocaine HCl                                |    |
| 82.  | DB328 | Tinidazole                                   |    |
| 83.  | DB330 | Levamisole HCl                               |    |
| 84.  | DB340 | Chlorpheniramine Maleate                     |    |
| 85.  | DB366 | Chondroitin Sulphate Sodium                  | 18 |
| 86.  | DB368 | Lactose Monohydrate                          |    |
| 87.  | DB369 | Lactulose                                    |    |
| 88.  | DB371 | Monosodium Glutamate                         |    |
| 89.  | DB380 | Sodium Saccharin                             |    |
| 90.  | DB392 | L-Arginine                                   | 19 |
| 91.  | DB393 | L-Citrulline                                 |    |
| 92.  | DB394 | L-Ornithine                                  |    |
| 93.  | DB410 | Methamphetamine                              |    |
| 94.  | DB416 | Salicin                                      |    |
| 95.  | DB424 | Thiamine B1 Mononitrate                      | 20 |
| 96.  | DB479 | Ibandronate Sodium                           |    |
| 97.  | DB480 | L-Phenylalanine                              |    |
| 98.  | DB481 | Ceftriaxone                                  |    |
| 99.  | DB492 | Rasagiline Mesylate                          |    |
| 100. | DB496 | Sucralose                                    |    |

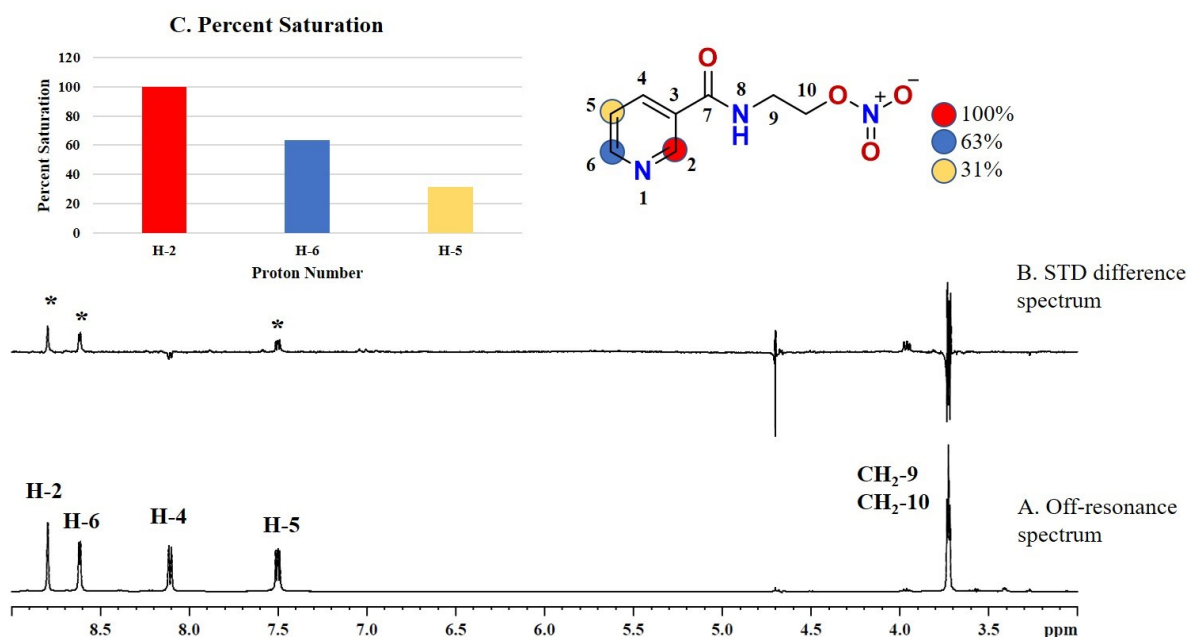

**Figure-S7:** STD-NMR Spectra of nicorandil (**5**): A. Reference spectrum of the drug. B. STD difference spectrum of nicorandil with urease subunit gamma, indicating the interacting protons of drug (Ligand protons interacting with protein are marked with '\*'). C. Graphical representation of percent saturation of ligands proton receiving from protein.

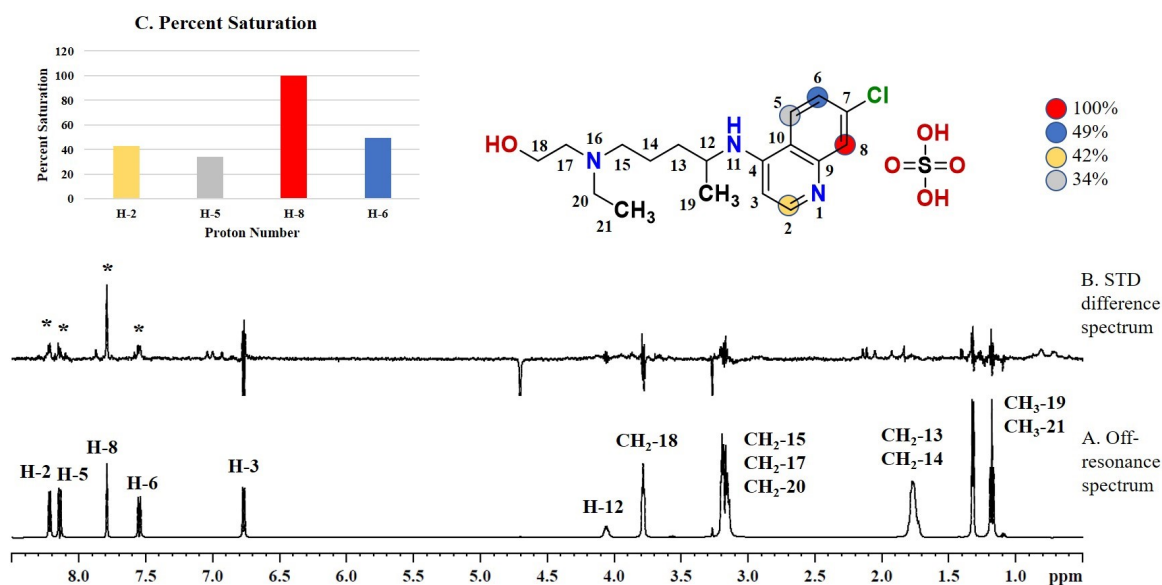

**Figure-S8:** STD-NMR Spectra of hydroxychloroquine sulphate (**6**): A. Reference spectrum of the drug. B. STD difference spectrum of hydroxychloroquine sulphate with urease subunit gamma, indicating the interacting protons of drug (Ligand protons interacting with protein are marked with '\*'). C. Graphical representation of percent saturation of ligands proton receiving from protein.

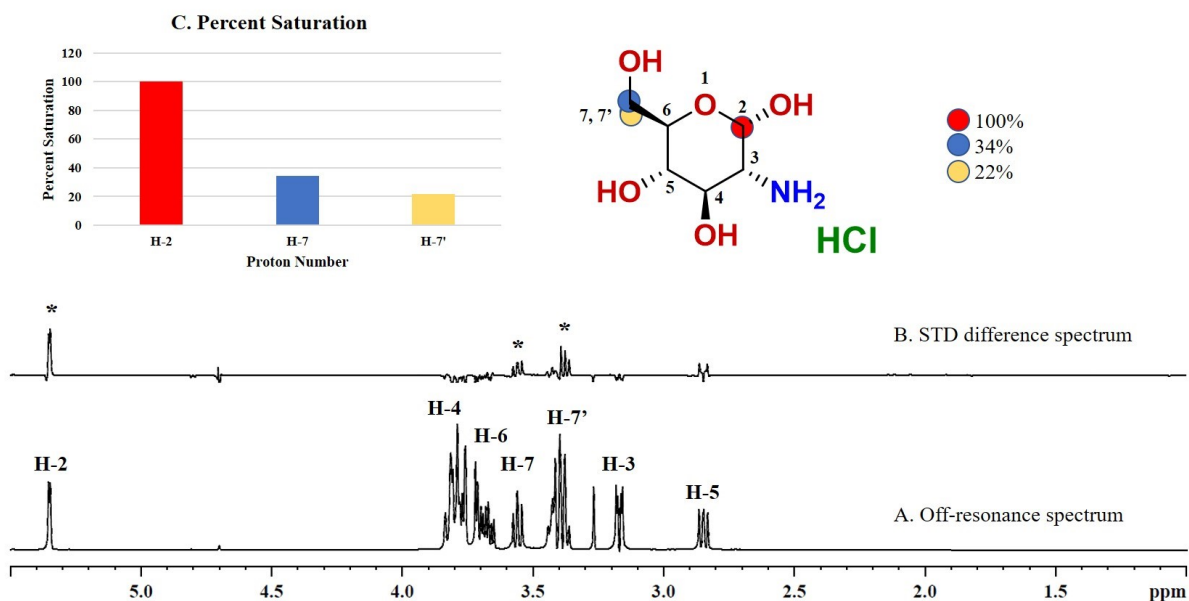

**Figure-S9:** STD-NMR Spectra of glucosamine HCl (**7**): A. Reference spectrum of the drug. B. STD difference spectrum of glucosamine HCl with urease subunit gamma, indicating the interacting protons of drug (Ligand protons interacting with protein are marked with '\*'). C. Graphical representation of percent saturation of ligands proton receiving from protein.

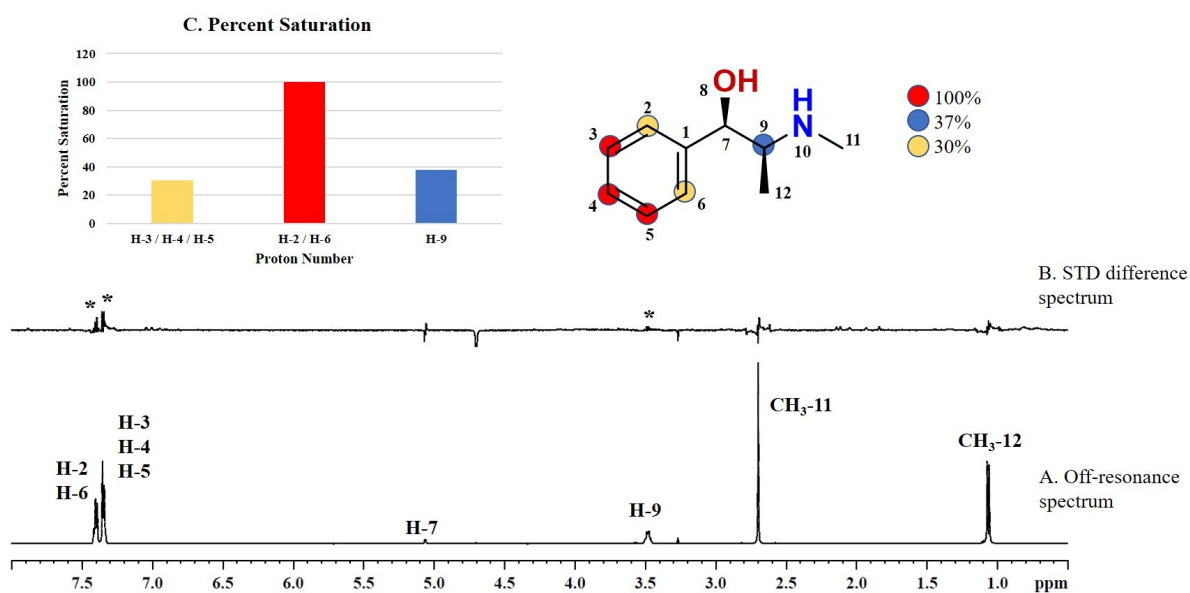

**Figure-S10:** STD-NMR Spectra of ephedrine (**8**): A. Reference spectrum of the drug. B. STD difference spectrum of ephedrine with urease subunit gamma, indicating the interacting protons of drug (Ligand protons interacting with protein are marked with '\*'). C. Graphical representation of percent saturation of ligands proton receiving from protein.



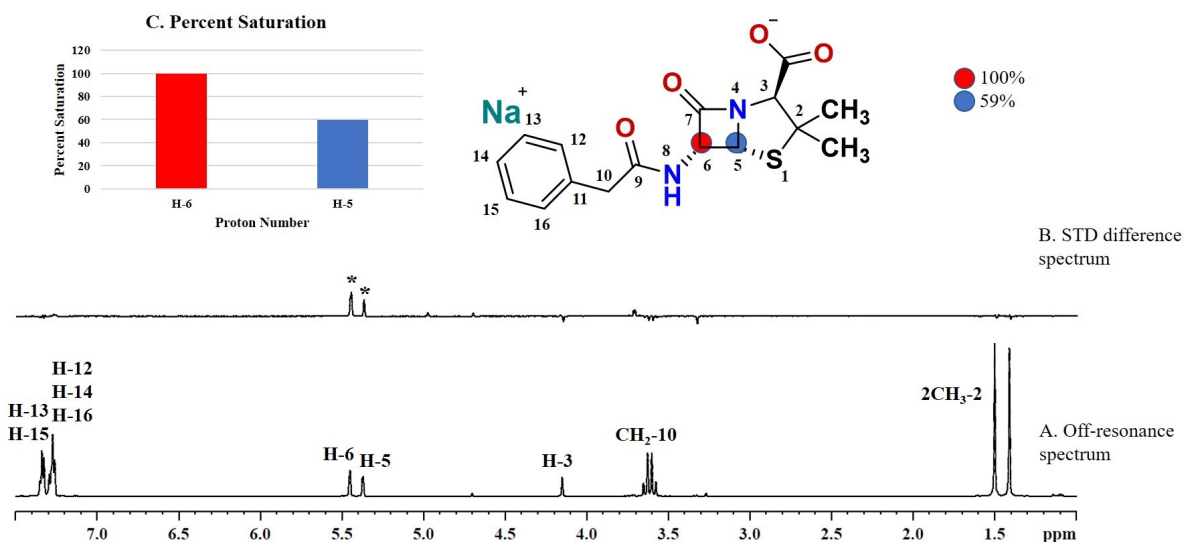

**Figure-S11:** STD-NMR Spectra of penicillin G sodium (**9**): A. Reference spectrum of the drug. B. STD difference spectrum of penicillin G sodium with urease subunit gamma, indicating the interacting protons of drug (Ligand protons interacting with protein are marked with '\*'). C. Graphical representation of percent saturation of ligands proton receiving from protein.

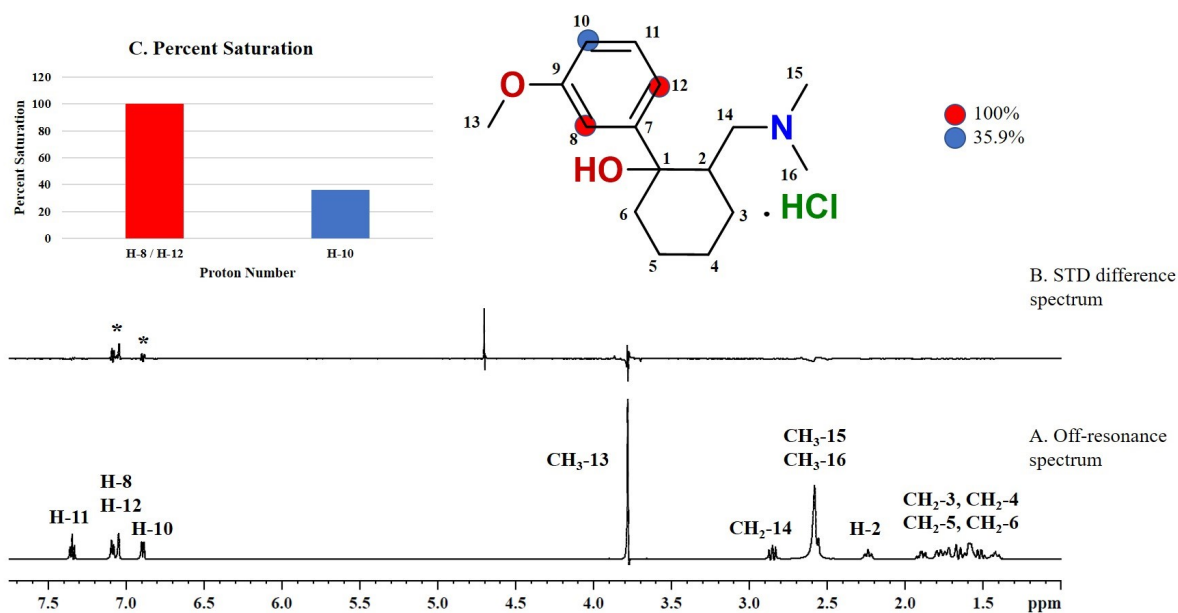

**Figure-S12:** STD-NMR Spectra of tramadol HCl (**10**): A. Reference spectrum of the drug. B. STD difference spectrum of tramadol HCl with urease subunit gamma, indicating the interacting protons of drug (Ligand protons interacting with protein are marked with '\*'). C. Graphical representation of percent saturation of ligands proton receiving from protein.

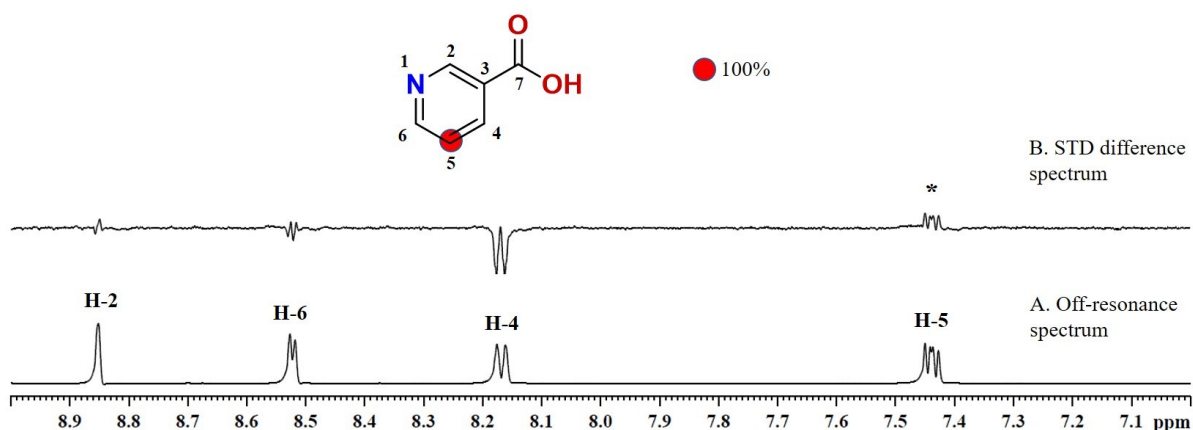

**Figure-S13:** STD-NMR Spectra of nicotinic acid (**11**): A. Reference spectrum of the drug. B. STD difference spectrum of nicotinic acid with urease subunit gamma, indicating the interacting protons of drug (Ligand protons interacting with protein are marked with '\*').

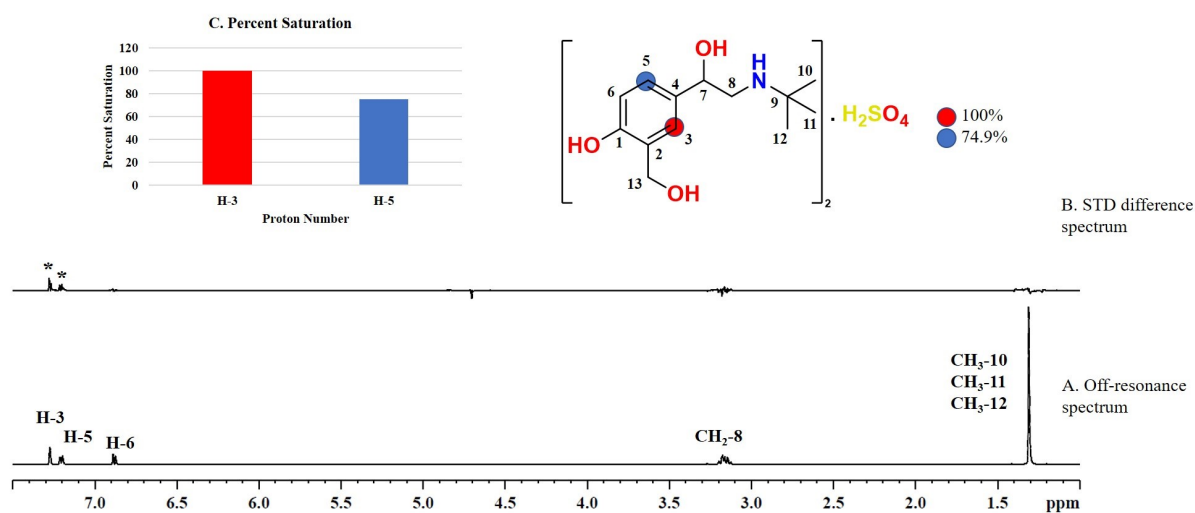

**Figure-S14:** STD-NMR Spectra of salbutamol sulfate (**12**): A. Reference spectrum of the drug. B. STD difference spectrum of salbutamol sulfate with urease subunit gamma, indicating the interacting protons of drug (Ligand protons interacting with protein are marked with '\*'). C. Graphical representation of percent saturation of ligands proton receiving from protein.

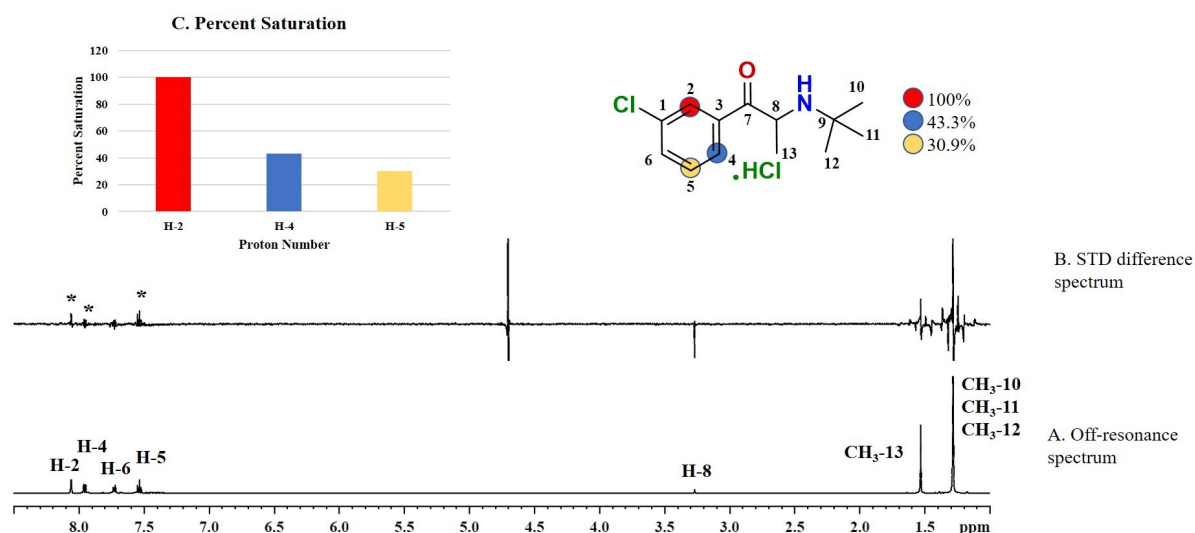

**Figure-S15:** STD-NMR Spectra of bupropion HCl (13): A. Reference spectrum of the drug. B. STD difference spectrum of bupropion HCl with urease subunit gamma, indicating the interacting protons of drug (Ligand protons interacting with protein are marked with “\*”). C. Graphical representation of percent saturation of ligands proton receiving from protein.

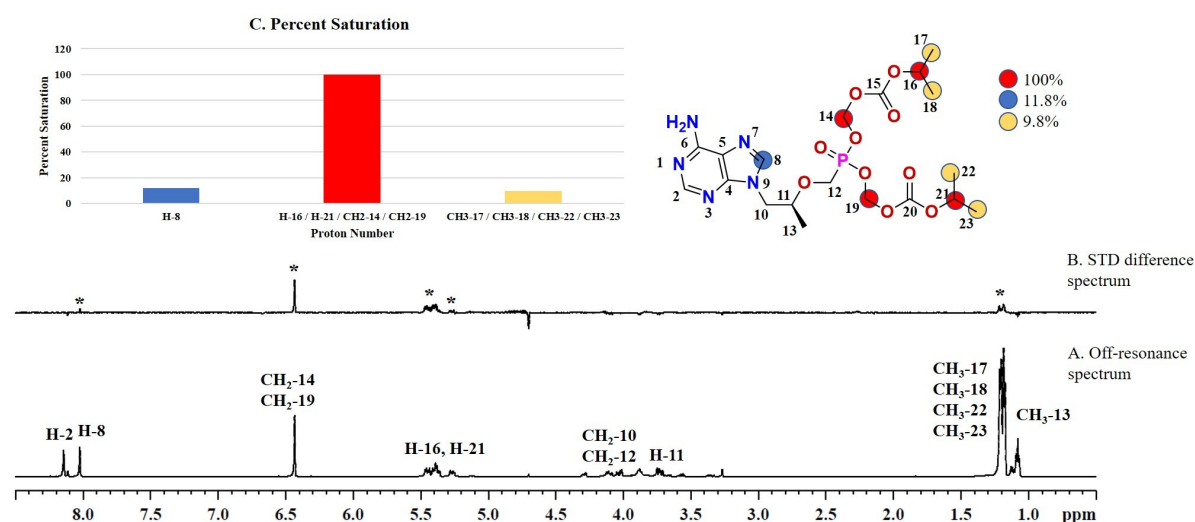

**Figure-S16:** STD-NMR Spectra of tenofovir disoproxil (14): A. Reference spectrum of the drug. B. STD difference spectrum of tenofovir disoproxil with urease subunit gamma, indicating the interacting protons of drug (Ligand protons interacting with protein are marked with “\*”). C. Graphical representation of percent saturation of ligands proton receiving from protein.

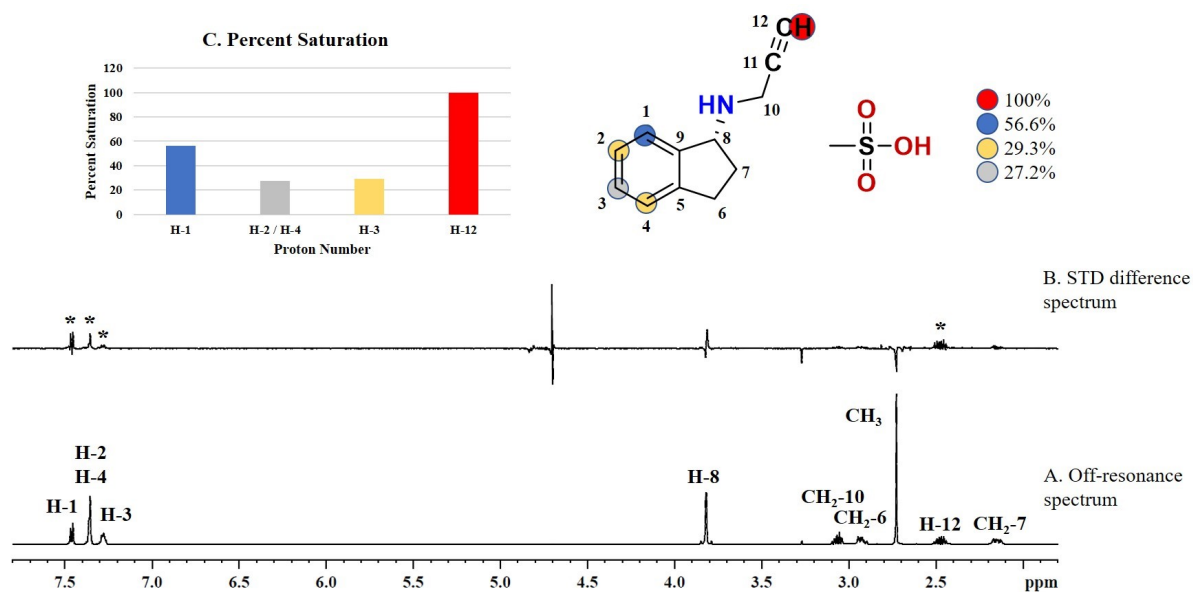

**Figure-S17:** STD-NMR Spectra of rasagiline mesylate (**15**): A. Reference spectrum of the drug. B. STD difference spectrum of Rasagiline Mesylate with urease subunit gamma, indicating the interacting protons of drug (Ligand protons interacting with protein are marked with “\*”). C. Graphical representation of percent saturation of ligands proton receiving from protein.

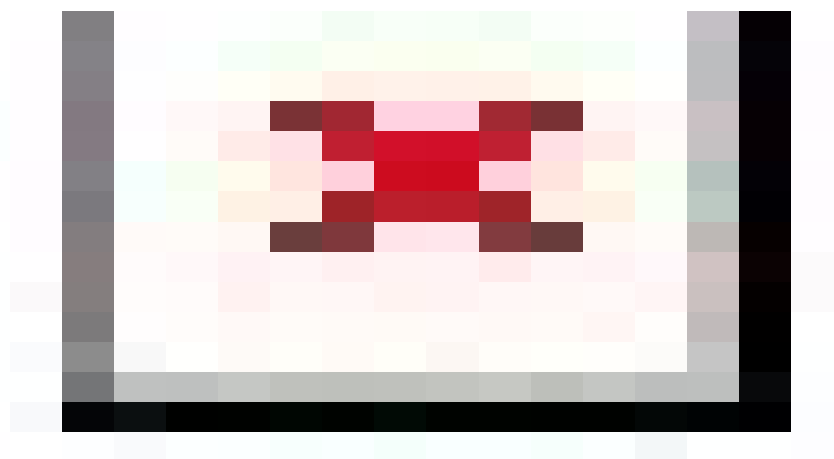

**Figure-S18:** Docked pose of nicotinamide (**1**) with urease subunit gamma. Protein-ligand interaction depicted in 3D representation (dotted lines), representing hydrogen bonding (black).

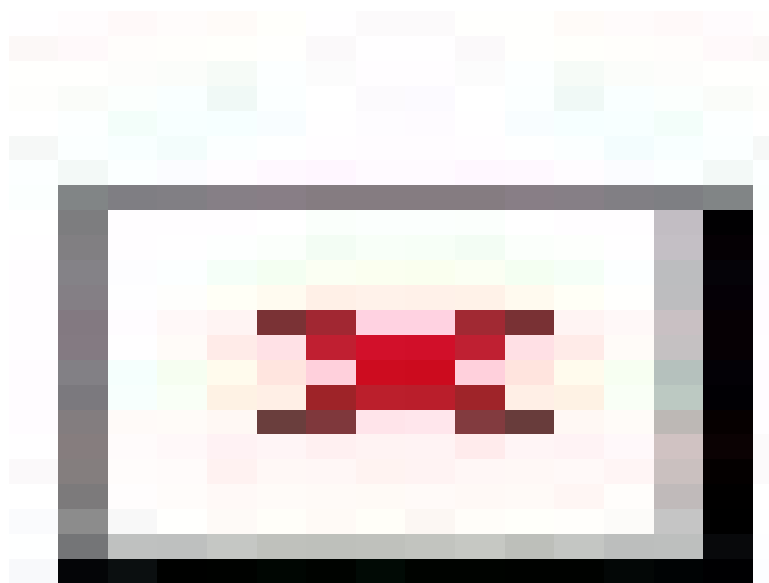

**Figure-S19:** Docked pose of drotaverine hydrochloride (**2**) with urease subunit gamma. Protein-ligand interaction depicted in 3D representation (dotted lines), representing aromatic hydrogen bonding (light blue).

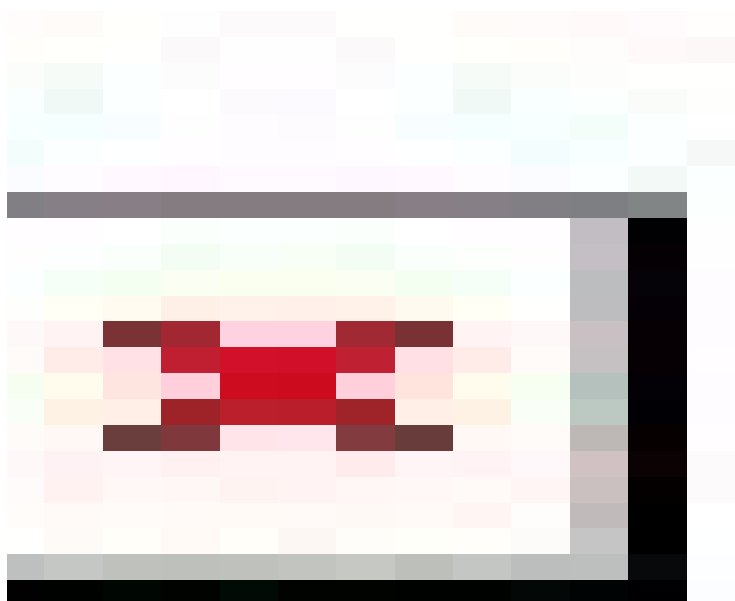

**Figure-S20:** Docked pose of sulfanilamide (**4**) with urease subunit gamma. Protein-ligand interaction depicted in 3D representation (dotted lines), representing hydrogen bonding (black).

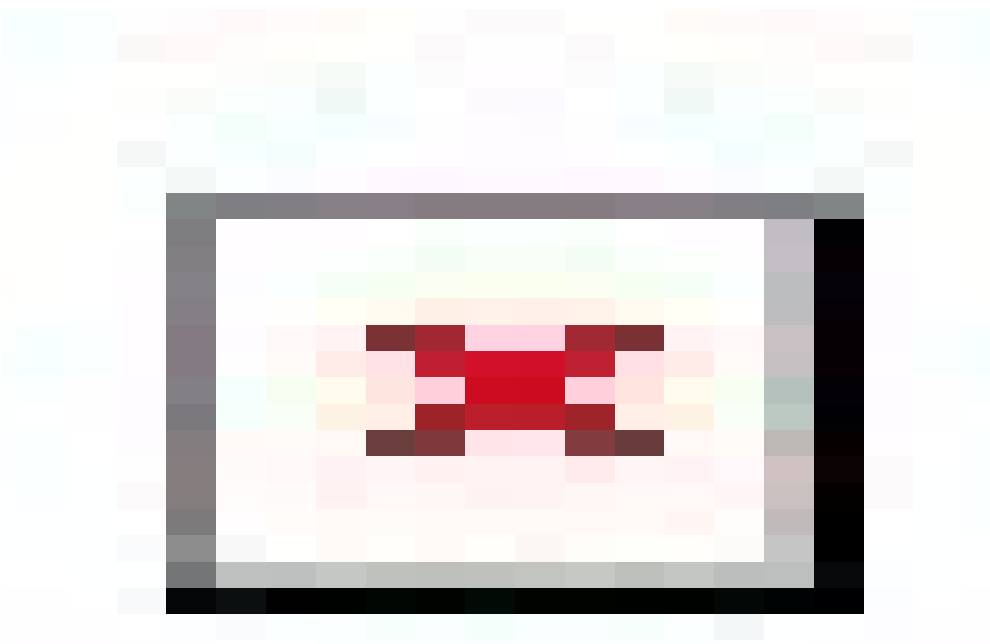

**Figure-S21:** Docked pose of nicorandil (**5**) with urease subunit gamma. Protein-ligand interaction depicted in 3D representation (dotted lines), representing hydrogen bonding (black) and salt bridges (pink).

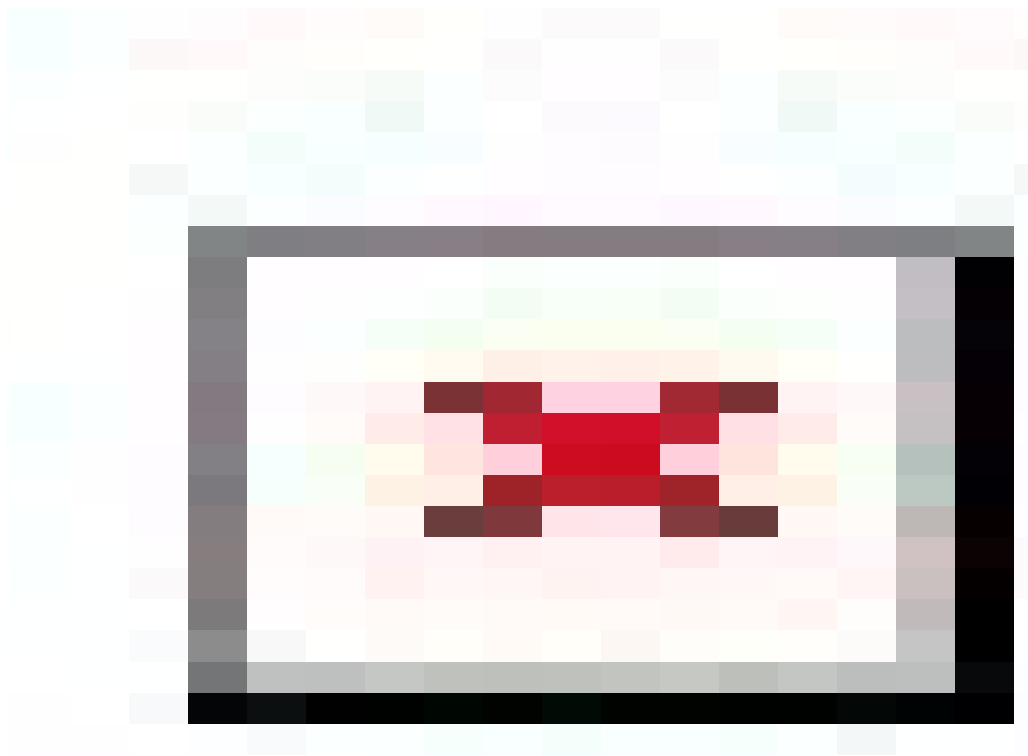

**Figure-S22:** Docked pose of hydroxychloroquine sulphate (**6**) with urease subunit gamma. Protein-ligand interaction depicted in 3D representation (dotted lines), representing hydrogen bonding (black), aromatic hydrogen bonding (light blue), and salt bridge (pink).

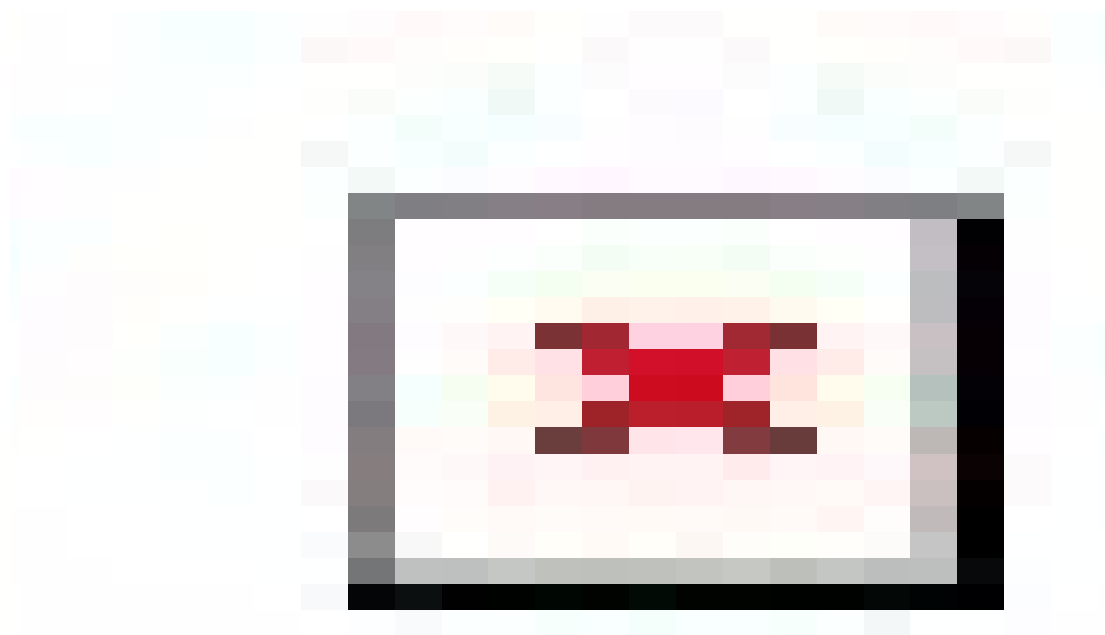

**Figure-S23:** Docked pose of glucosamine hydrochloride (7) with urease subunit gamma. Protein-ligand interaction depicted in 3D representation (dotted lines), representing hydrogen bonding (black).

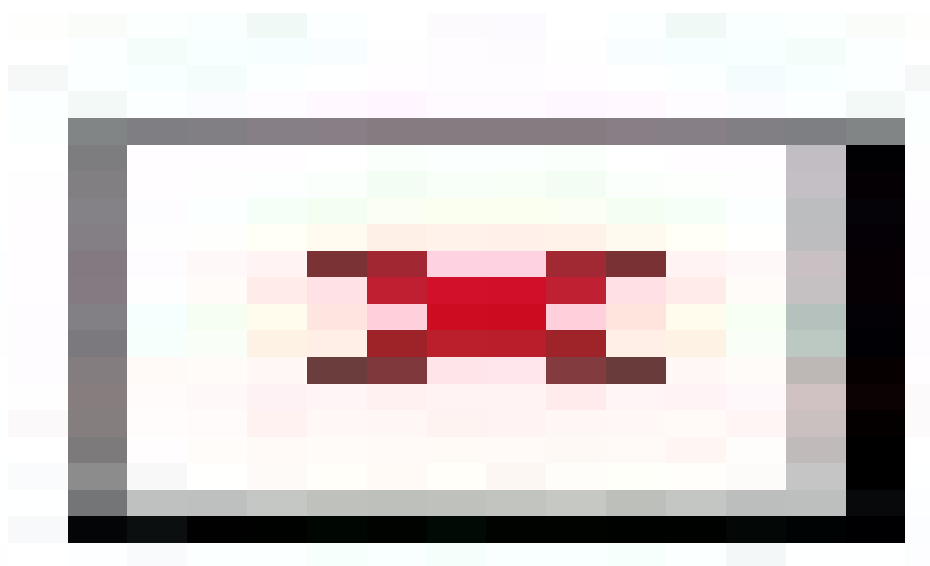

**Figure-S24:** Docked pose of penicillin G sodium (9) with urease subunit gamma. Protein-ligand interaction depicted in 3D representation (dotted lines), representing hydrogen bonding (black),  $\pi$ - $\pi$  stacking (red), and salt bridge (pink).

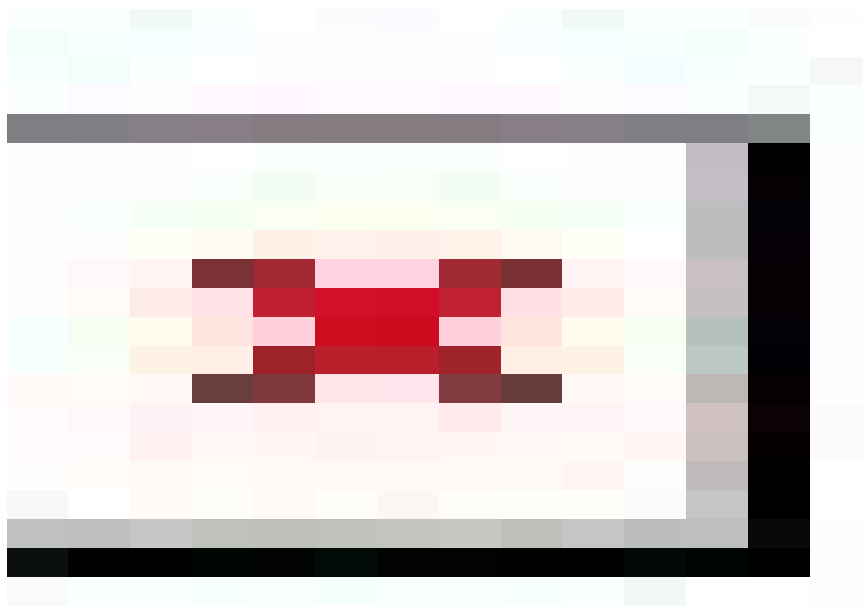

**Figure-S25:** Docked pose of tramadol hydrochloride (**10**) with urease subunit gamma. Protein-ligand interaction depicted in 3D representation (dotted lines), representing  $\pi$ - $\pi$  stacking (blue).

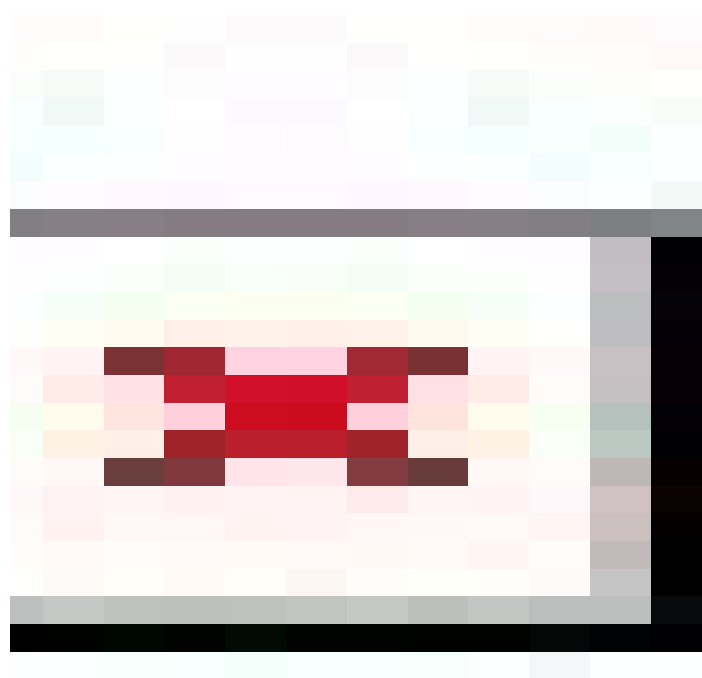

**Figure-S26:** Docked pose of nicotinic acid (**11**) with urease subunit gamma. Protein-ligand interaction depicted in 3D representation (dotted lines), representing hydrogen bonding (black), salt bridge (pink), and aromatic hydrogen bond (light blue).



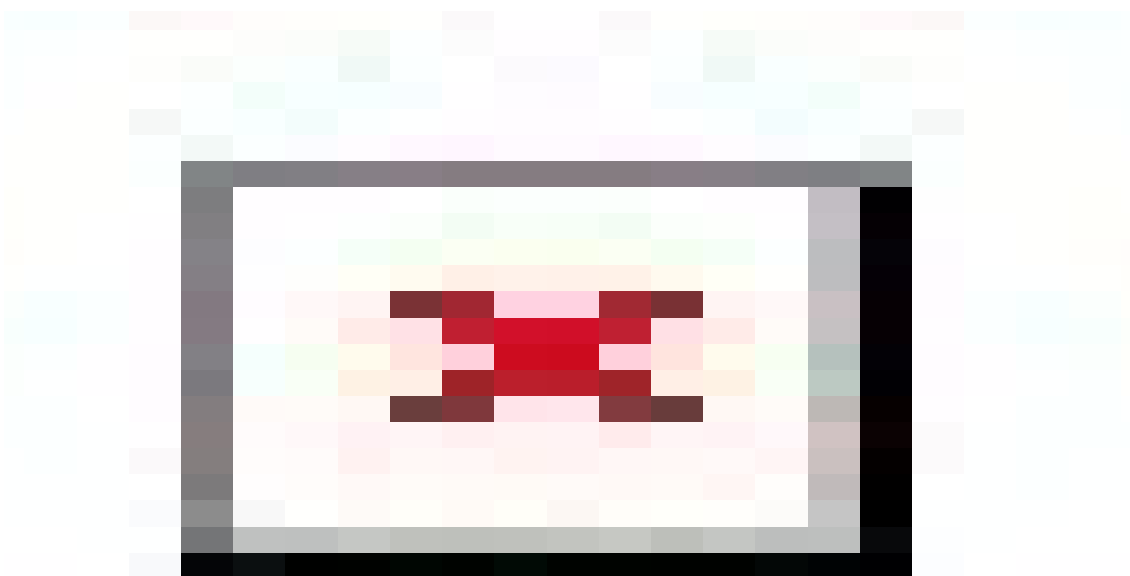

**Figure-S27:** Docked pose of salbutamol sulfate (**12**) with urease subunit gamma. Protein-ligand interaction depicted in 3D representation (dotted lines), representing hydrogen bonding (black), and salt bridge (pink).

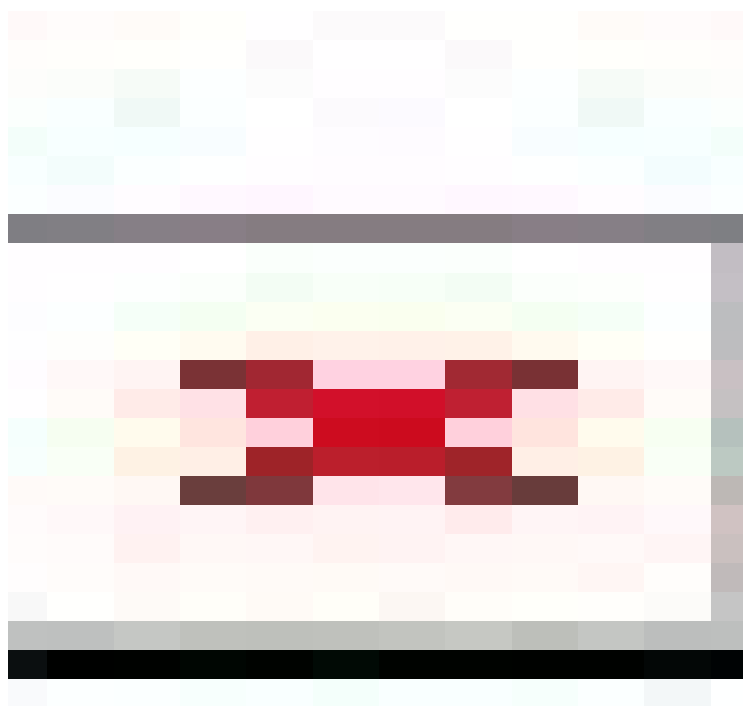

**Figure-S28:** Docked pose of bupropion hydrochloride (**13**) with urease subunit gamma. Protein-ligand interaction depicted in 3D representation (dotted lines), representing halogen bonding (golden).

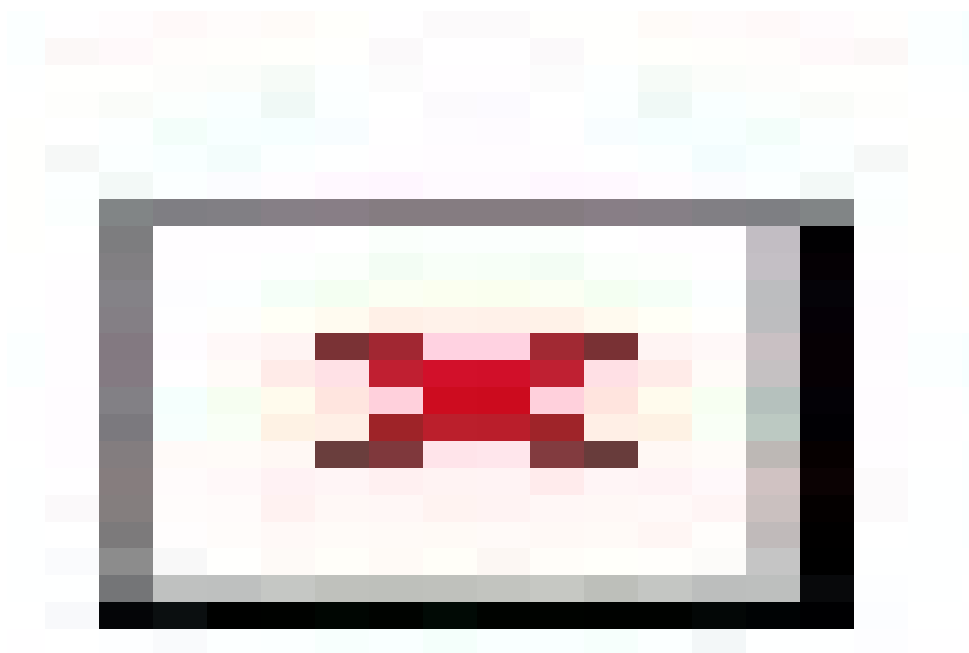

**Figure-S29:** Docked pose of tenofovir disoproxil (**14**) with urease subunit gamma. Protein-ligand interaction depicted in 3D representation.

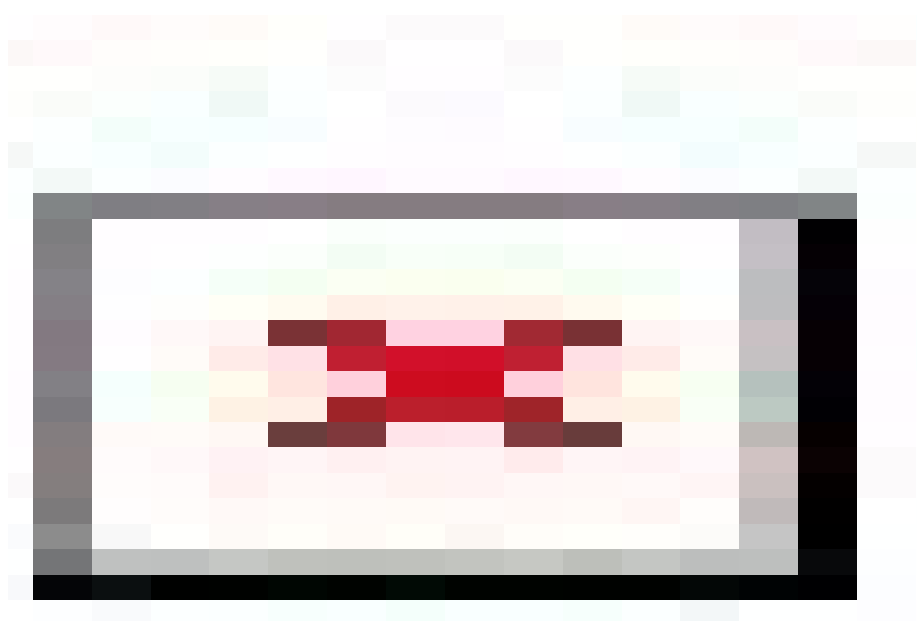

**Figure-S30:** Docked pose of rasagiline mesylate (**15**) with urease subunit gamma. Protein-ligand interaction depicted in 3D representation (dotted lines), representing  $\pi$ -cationic interaction (blue), aromatic hydrogen bonding (light blue), and  $\pi$ - $\pi$  stacking (red).

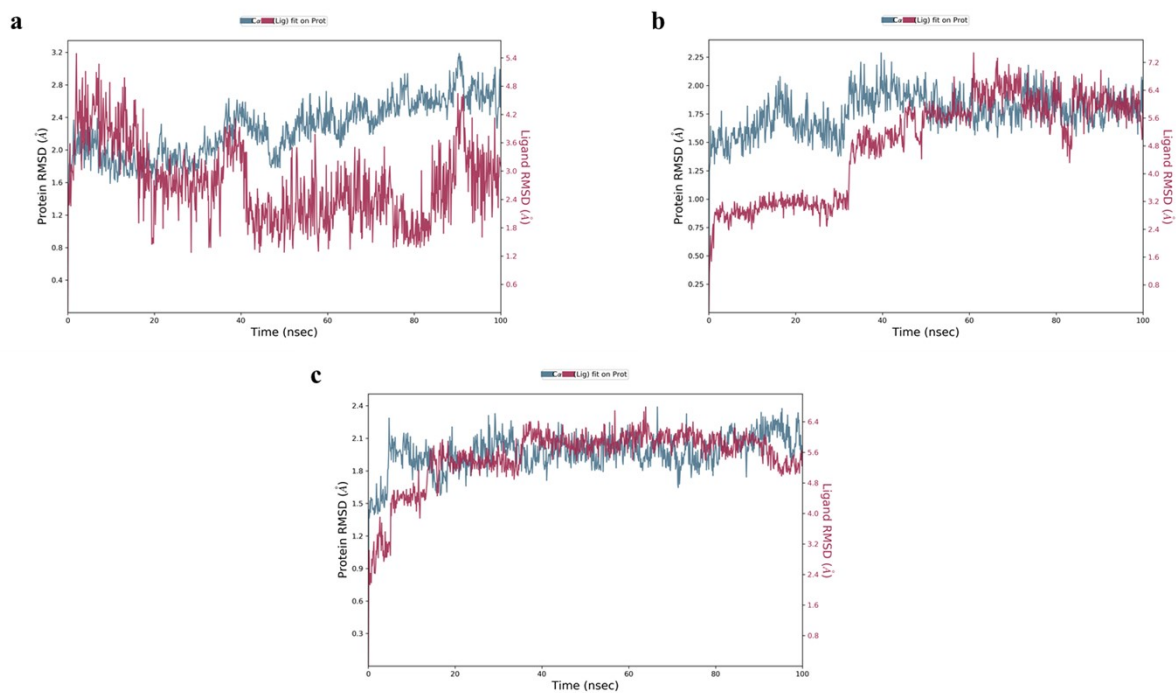

**Figure-S31:** RMSD plots of drotaverine HCl (a), penicillin G sodium (b), and tenofovir disoproxil (c) with UreA protein.

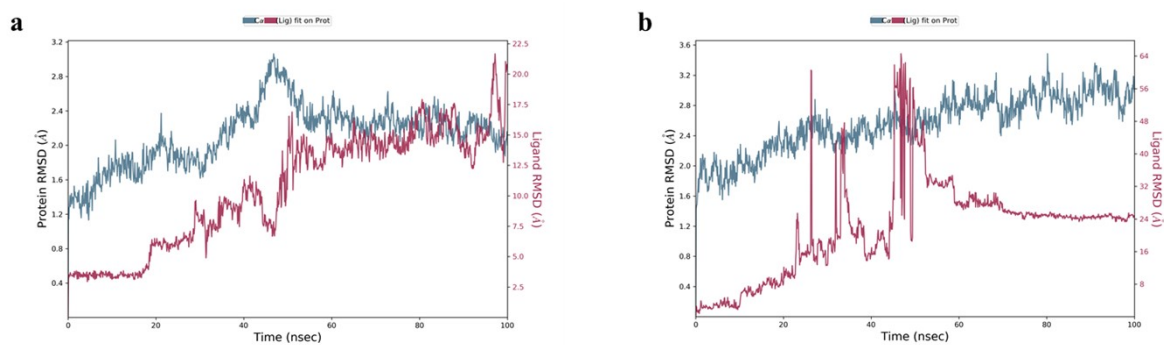

**Figure-S32:** RMSD plots of hydroxychloroquine sulphate (a) and ephedrine (b) with UreA protein.



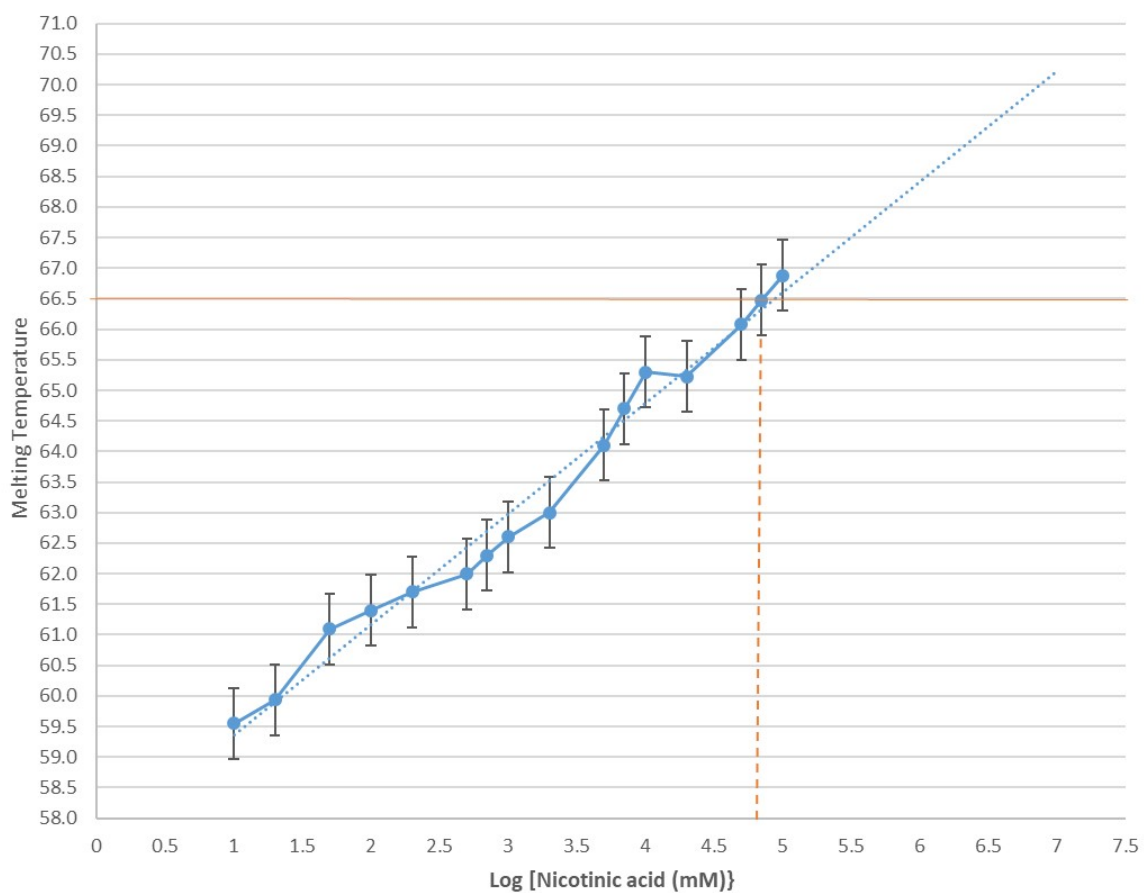

**Figure-S34:** The variation in  $T_m$  with increasing concentration of nicotinic acid (blue solid line). The blue dashed line represents the linear extrapolation of the curve at higher concentrations and the solid orange line represent  $T_{m_0}$ , *i.e.* the  $T_m$  of protein in the absence of ligand. These two lines intercept at the log of the  $K_d$  value.
